# Supplementary material
Source: Springer Nature journal article supplement (https://www.springermedizin.de/resource/supplementary/12959_2010_125_MOESM3_ESM.pdf/9569630)

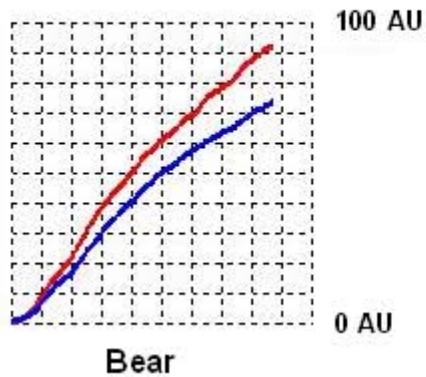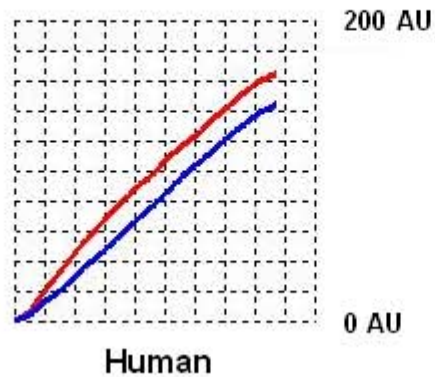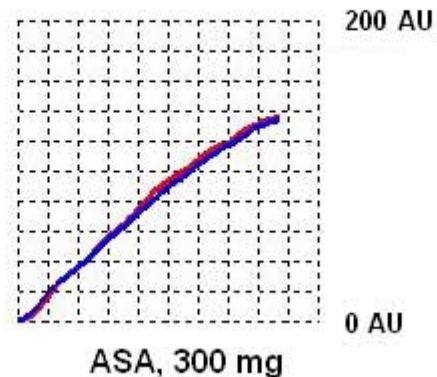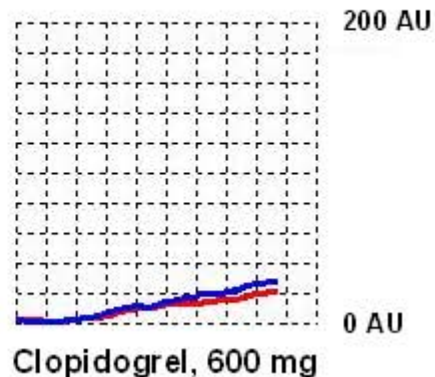

Supplement: MOESM3 [file 9569630]
